# Supplementary material
Source: Springer Nature journal article supplement (http://www.springernews.com/resource/supplementary/13075_2010_9715_MOESM1_ESM.pdf/9693580)

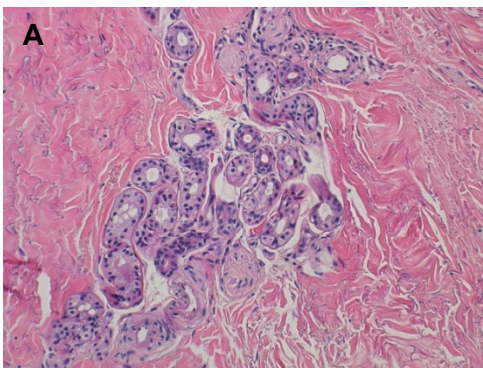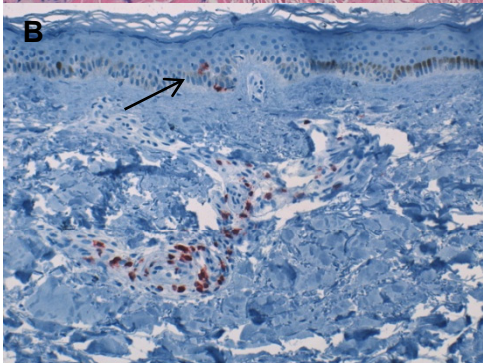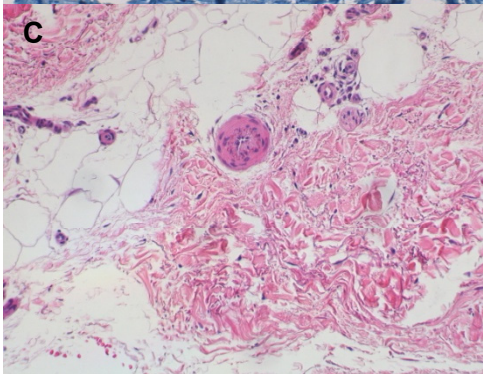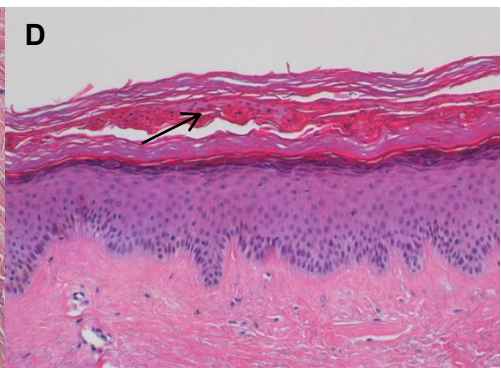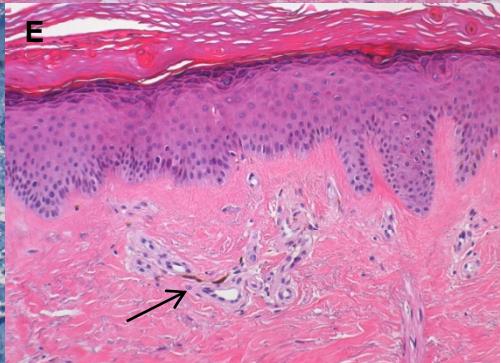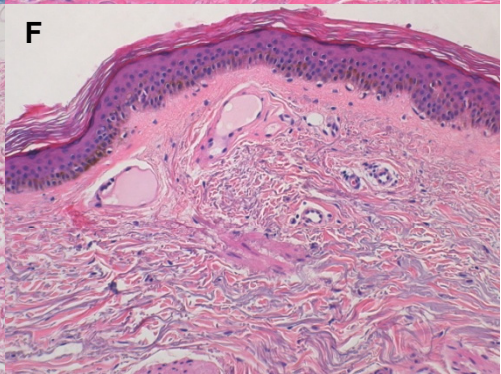

Supplement: MOESM1 [file 9693580]
